# Supplementary material for: Advanced Hybrid System for Ammonium Valorization as Liquid Fertilizer from Treated Urban Wastewaters: Validation of Natural Zeolites Pretreatment and Liquid-Liquid Membrane Contactors at Pilot Plant Scale
Source: MDPI journal article supplement (doi:10.3390/membranes13060580), 2023-06-02
Supplement: s1 [file s1]

# Advanced Hybrid System for Ammonium Valorization as Liquid Fertilizer from Treated Urban Wastewaters: Validation of Natural Zeolites Pretreatment and Liquid-Liquid Membrane Contactors at Pilot Plant Scale

Álvaro Mayor <sup>1</sup>, Mònica Reig <sup>2,3,\*</sup>, Xanel Vecino <sup>4</sup>, José Luis Cortina <sup>1,2,3</sup> and César Valderrama <sup>2,3</sup>

<sup>1</sup> CETaqua, Carretera d'Esplugues, 75, 08940 Cornellà de Llobregat, Spain; amayor@cetaqua.com (A.M.); jose.luis.cortina@upc.edu (J.L.C.)

<sup>2</sup> Chemical Engineering Department, Escola d'Enginyeria de Barcelona Est (EEBE) Universitat Politècnica de Catalunya (UPC)-BarcelonaTECH, C/Eduard Maristany 10-14, Campus Diagonal-Besòs, 08930 Barcelona, Spain; cesar.alberto.valderrama@upc.edu

<sup>3</sup> Barcelona Research Center for Multiscale Science and Engineering, Campus Diagonal-Besòs, 08930 Barcelona, Spain

<sup>4</sup> CINTECX, Chemical Engineering Department, Campus as Lagoas-Marcosende, University of Vigo, 36310 Vigo, Spain; xanel.vecino@uvigo.es

\* Correspondence: monica.reig@upc.edu

## 1. Supplementary materials

Table S1 Operation parameters of the membrane contactors unit

| Parameter                       | Value   | Units             |
|---------------------------------|---------|-------------------|
| Feed/ acid volume ratio storage | 100     | L/L               |
| Feed and acid flowrates         | 0.5 – 2 | m <sup>3</sup> /h |
| Temperature                     | 18 – 25 | °C                |
| Feed pH                         | >11     |                   |
| Operating voltage               | 380     | VAC-50 Hz-3F+N    |
| Power                           | 27.7    | kW                |

Table S2 Organic micropollutant characterization in mainstream

| OMP (µg/L)    | Zeolite influent | Zeolite concentrate |
|---------------|------------------|---------------------|
| Celestolide   | <0.01            | 0.52                |
| Galaxolide    | 0.16             | <0.01               |
| Tonalide      | 0.07             | <0.01               |
| Carbamazepine | 0.15             | 0.16                |
| Diazepam      | 0.01             | <0.001              |
| Ibuprofen     | 0.06             | 0.34                |
| Naproxen      | <0.005           | <0.005              |
| Diclofenac    | 2.83             | <0.02               |
| 4-octylphenol | <0.004           | <0.004              |
| 4-nonylphenol | <0.004           | <0.004              |
| Bisphenol A   | <0.005           | <0.005              |
| Triclosan     | <0.01            | <0.01               |

|                   |        |        |
|-------------------|--------|--------|
| Erythromycin      | 0.04   | <0.001 |
| Fluoxetine        | 0.03   | 0.01   |
| Roxithromycin     | <0.004 | 0.005  |
| Sulfamethoxazole  | 0.14   | 0.04   |
| Trimethoprim      | 0.27   | 0.07   |
| Citalopram        | 0.19   | <0.003 |
| Estrona           | <0.003 | <0.002 |
| Estradiol         | <0.003 | <0.002 |
| ethinyl estradiol | <0.003 | <0.002 |

Table S3 Ionic composition of each fertilizer

| Compound (mg/L)  | Fert 1 | Fert 2 | Fert 3 | Fert 4 | Fert 5 | Fert 6 | Fert 7 | Fert 8 | Fert 9 |
|------------------|--------|--------|--------|--------|--------|--------|--------|--------|--------|
| Al               | 0.02   | <0.01  | 1.97   | 1.67   | 0.45   | 0.18   | <0.01  | 0.66   | 1.96   |
| As               | 0.02   | 0.01   | 0.02   | 0.02   | 0.01   | 0.02   | 0.02   | 0.03   | 0.02   |
| B                | 0.05   | <0.01  | 0.02   | 0.08   | 0.05   | 0.04   | <0.01  | 0.03   | 0.05   |
| Ca <sup>2+</sup> | 9.79   | 10.71  | 8.16   | 9.75   | 9.92   | 24.83  | 16.61  | 22.37  | 29.76  |
| Cr               | <0.01  | <0.01  | 0.09   | 0.05   | 0.08   | 0.15   | 0.01   | 0.08   | 0.05   |
| Cu               | 0.04   | 0.1    | 0.09   | 0.18   | 0.29   | 4.13   | 0.07   | 0.26   | 0.79   |
| Fe               | 0.05   | 0.01   | 1.92   | 0.3    | 0.44   | 3.72   | 0.05   | 0.4    | 0.54   |
| K <sup>+</sup>   | 51.4   | 41.4   | 60.7   | 67.6   | 47.7   | 44.2   | 46.6   | 45.00  | 73.00  |
| Li               | 0.01   | 0.01   | 0.01   | 0.02   | 0.02   | 0.02   | 0.02   | 0.02   | 0.02   |
| Mg <sup>2+</sup> | 2.09   | 2.59   | 2.84   | 2.93   | 2.72   | 7.79   | 3.57   | 7.85   | 6.72   |
| Mn               | 0.04   | 0.05   | 0.04   | 0.04   | 0.04   | 0.15   | 0.04   | 0.1    | 0.1    |
| Mo               | 0.02   | 0.09   | 0.05   | 0.02   | 0.02   | 0.04   | 0.04   | 0.01   | 0.07   |
| Na <sup>+</sup>  | 3081   | 2462   | 3326   | 3940   | 3592   | 3224   | 3488   | 3391   | 4468   |
| Ni               | 0.03   | 0.06   | 0.03   | 0.03   | 0.05   | 0.17   | 0.02   | 0.06   | 0.04   |
| Pb               | <0.01  | <0.01  | 0.01   | 0.05   | 0.08   | 0.14   | 0.01   | 0.05   | 0.1    |
| P                | 0.27   | 0.16   | 1.12   | 2.01   | 2.14   | 6.17   | 2.22   | 2.27   | 7.34   |
| Rb               | 0.04   | 0.03   | 0.04   | 0.05   | 0.03   | 0.03   | 0.03   | 0.08   | 0.14   |
| Si               | 10.93  | 6.46   | 13.13  | 24.3   | 27.66  | 18.66  | 17.76  | 12.16  | 30.89  |
| S                | 35.21  | 19.54  | 25.24  | 39.79  | 40.83  | 40.12  | 31.71  | 32.86  | 33.68  |
| Sr               | 0.16   | 0.15   | 0.11   | 0.16   | 0.13   | 0.42   | 0.32   | 0.4    | 0.58   |
| Tl               | 0.01   | 0.01   | <0.01  | <0.01  | 0.01   | 0.01   | 0.02   | 0.01   | 0.01   |
| Zn               | 0.18   | 0.4    | 0.15   | 0.54   | 0.85   | 3.41   | 0.11   | 0.95   | 1.86   |

Be, Bi, Co, Cd, La, Sb, Se, Ti and, V were below the limit of quantification (0.01 mg/L)

Table S4 Organic micropollutants (OMP) composition of each fertilizer

| OMP (ng/L)       | ZC*  | Fert 1 | Fert 2 | Fert 3 | Fert 4 | Fert 5 | Fert 6 | Fert 7 | Fert 8 | Fert 9 |
|------------------|------|--------|--------|--------|--------|--------|--------|--------|--------|--------|
| Ciprofloxacin    | 705  | 44     | 130    | 21     | 34     | 20     | 16     | 46     | <1.8   | <1.8   |
| Sulfadiazine     | 4    | <0.5   | <0.5   | <0.5   | <0.5   | <0.5   | <0.5   | <0.5   | <0.5   | 5      |
| Oxytetracycline  | 697  | <2.0   | <2.0   | <2.0   | <2.0   | <2.0   | <2.0   | <2.0   | <2.0   | <2.0   |
| Sulfamethoxazole | <4.4 | <4.4   | <4.4   | <4.4   | <4.4   | <4.4   | <4.4   | <4.4   | <4.4   | <4.4   |
| Azithromycin     | 146  | <4.0   | <4.0   | <4.0   | <4.0   | <4.0   | <4.0   | <4.0   | <4.0   | <4.0   |
| Trimethoprim     | 23   | <1.4   | <1.4   | <1.4   | <1.4   | <1.4   | <1.4   | <1.4   | <1.4   | <1.4   |
| Citalopram       | <1.8 | 9      | 10     | <1.8   | <1.8   | <1.8   | <1.8   | 11     | 9      | 14     |

---

|               |       |       |       |       |       |       |       |       |       |       |
|---------------|-------|-------|-------|-------|-------|-------|-------|-------|-------|-------|
| Fluoxetine    | <35.4 | <35.4 | <35.4 | <10.6 | <10.6 | <10.6 | <10.6 | <35.4 | <35.4 | <35.4 |
| Diazepam      | <5.9  | <5.9  | <5.9  | <5.9  | <5.9  | <5.9  | <5.9  | <5.9  | <5.9  | <5.9  |
| Carbamazepine | <6.4  | 15    | <6.4  | <6.4  | 303   | <6.4  | <6.4  | <6.4  | <6.4  | <6.4  |
| Methiocarb    | <11.1 | <11.1 | <11.1 | <11.1 | 14    | <11.1 | <11.1 | <11.1 | <11.1 | <11.1 |

\*ZC: zeolite concentrate after regeneratio with NaOH
